# Supplementary material for: High-performance, ambient-processable organic solar cells achieved by single terpene-based entirely eco-friendly process
Source: Royal Society of Chemistry journal article supplement (doi:10.1039/d4ta07223e), 2024-11-13
Supplement: d4ta07223e1.pdf [file d4ta07223e1.pdf]

## Supplementary Information

### **High-Performance, Ambient-Processable Organic Solar Cells Achieved by Single Terpene-Based Entirely Eco-Friendly Process**

*Hyerin Jeon<sup>a</sup>, Jin-Woo Lee<sup>a</sup>, Kihyun Bae<sup>a</sup>, Tan Ngoc-Lan Phan<sup>a</sup>, Chulhee Lim<sup>a</sup>, Jaeyoung Choi<sup>a</sup>,  
Cheng Wang<sup>b</sup>, Seungjin Lee<sup>c,\*</sup>, and Bumjoon J. Kim<sup>a,\*</sup>*

<sup>a</sup>Department of Chemical and Biomolecular Engineering, Korea Advanced Institute of Science and Technology (KAIST), Daejeon 34141, Republic of Korea

<sup>b</sup>Advanced Light Source, Lawrence Berkeley National Laboratory, 1 Cyclotron Road, Berkeley, CA 94720, United States

<sup>c</sup> Photoenergy Research Center, Korea Research Institute of Chemical Technology (KRICT), Daejeon 34114, Republic of Korea

\* All correspondence should be addressed to B. J. K. and S. Lee (E-mail: [bumjoonkim@kaist.ac.kr](mailto:bumjoonkim@kaist.ac.kr), [332sjin@kRICT.re.kr](mailto:332sjin@kRICT.re.kr))

## Supplementary Schemes, Figures, and Tables

**Scheme S1.** Synthetic scheme for MYBO.

**Fig. S1.**  $^1\text{H}$  NMR spectrum of BTP-BO-2CHO in methylene chloride- $d_2$ .

**Fig. S2.**  $^1\text{H}$  NMR spectrum of MYBO in chloroform- $d_2$ .

**Fig. S3.** MALDI-ToF spectrum of MYBO.

**Fig. S4.** CVs of (a) PTQ10 donor, (b) L8-BO, (c) MYBO, and (d) ferrocene. (e) Energy levels of PTQ10 and SMAs.

**Fig. S5.** Photograph of SMA solutions dissolved in Eu (5 mg mL $^{-1}$ ).

**Fig. S6.** UV–Vis absorption spectra of (a) pristine PTQ10, L8-BO, and MYBO, and (b) L8-BO and MYBO blend with PTQ10 in film state.

**Fig. S7.** UV–Vis absorption spectra of pristine solution (a) L8-BO, and (b) MYBO in toluene at different temperatures.

**Fig. S8.** DSC thermograms of pristine SMA films with different processing solvents obtained during the 1<sup>st</sup> heating cycle.

**Fig. S9.** Summary of PCEs of terpene-based OSCs depending on the total LD50 value from the literature and this work. Total LD50 was calculated by summation of the ATE value.

**Fig. S10.** Light intensity-dependent  $J_{\text{SC}}$  plots of PTQ10-based OSCs.

**Fig. S11.** Orientation of crystalline domains in (a) L8-BO, and (b) MYBO-based blends processed from Eu.

**Fig. S12.** DSC thermograms of blend films with different processing solvents obtained during the 1<sup>st</sup> heating cycle.

**Fig. S13.** (a) 2D contour maps of *in-situ* UV–Vis absorption spectra of PTQ10:SMA systems processed with CF and their (b) changes in absorbance at the  $\lambda_{\text{max}}$  of PTQ10 and SMA.

**Table S1.** Molecular weight information of PTQ10 donor measured by GPC at 80°C using *ortho*-dichlorobenzene as eluent.

**Table S2.** Calculation of HSPs of PTQ10 with functional group contribution terms.

**Table S3.** Calculation of HSPs of L8-BO with functional group contribution terms.

**Table S4.** Calculation of HSPs of MYBO with functional group contribution terms.

**Table S5.** Optical properties of pristine SMA films with toluene (Tol) and Eu.

**Table S6.** DSC results and SCLC electron mobilities of the pristine SMA films.

**Table S7.** Photovoltaic performances of PTQ10:L8-BO-based OSCs processed from CF with different solution temperature and thickness.

**Table S8.** Photovoltaic performances of PTQ10:MYBO-based OSCs processed from CF with different solution temperature.

**Table S9.** Photovoltaic performances of PTQ10:MYBO-based OSCs processed from CF with different thickness.

**Table S10.** Photovoltaic performances of PTQ10:MYBO-based OSCs processed from Eu with different solution temperature.

**Table S11.** Photovoltaic performances of PTQ10:MYBO-based OSCs processed from Eu with different molecular weight of PTQ10.

**Table S12.** Photovoltaic performances of PTQ10:MYBO-based OSCs processed from Eu with different thickness.

**Table S13.** Photovoltaic performances of PTQ10:MYBO-based OSCs processed from Eu with different thermal annealing temperature and time.

**Table S14.** Comparison of the PCE values of the reported terpene-based OSCs (single terpene (Single), terpene + additive (Additive) and terpene mixtures (Mixture)) and this work.

**Table S15.** SCLC mobilities for the PTQ10:SMA blend films.

**Table S16.** Packing orientation of the blends.

**Table S17.** Optical properties and DSC results of blend films.

**Table S18.** Saturation times of the absorption of the PTQ10:MYBO in Eu with different processing condition.

**Table S19.** Photovoltaic performance of PTQ10:MYBO in Eu.

**Table S20.** Saturation times of the absorption of the PTQ10:SMAs in CF.

## Experimental Section

**Materials:** All solvents were purchased from Tokyo Chemical Industry Co., LTD and Thermo Fisher Scientific Inc. Poly[(thiophene)-*alt*-(6,7-difluoro-2-(2-hexyldecyloxy)quinoxaline)] (PTQ10) was synthesized by previous study procedures.<sup>1</sup> 2,2'-((2Z,2'Z)-((12,13-bis(2-ethylhexyl)-3,9-(2-butyloctyl)-12,13-dihydro-[1,2,5]thiadiazolo[3,4-*e*]thieno[2'',3'':4',5']thieno[2',3':4,5]pyrrolo[3,2-*g*]thieno[2',3':4,5]thieno[3,2-*b*]indole-2,10-diyl)bis(methanylylidene))bis(5,6-difluoro-3-oxo-2,3-dihydro-1*H*-indene-2,1-diylidene))dimalononitrile (L8-BO) was purchased from Solarmer Inc. 3,9-bis(2-butyloctyl)-12,13-bis(2-octyldodecyl)-12,13-dihydro-[1,2,5]thiadiazolo[3,4-*e*]thieno[2'',3'':4',5']thieno[2',3':4,5]pyrrolo[3,2-*g*]thieno[2',3':4,5]thieno[3,2-*b*]indole (BTP-BO) for the synthesis of MYBO was purchased from Derthon Opto electronic Materials Sci. Tech. Co., Ltd. Poly[(9,9-bis(3'-((*N,N*-dimethyl)-*N*-ethylammonium)propyl)-2,7-fluorene)-*alt*-5,5'-bis(2,2'-thiophene)-2,6-naphthalene-1,4,5,8-tetracarboxylic-*N,N'*-di(2-ethylhexyl)imide]dibromide (PNDIT-F3N-Br) was synthesized according to the reported method.<sup>2</sup>

## Synthesis of MYBO

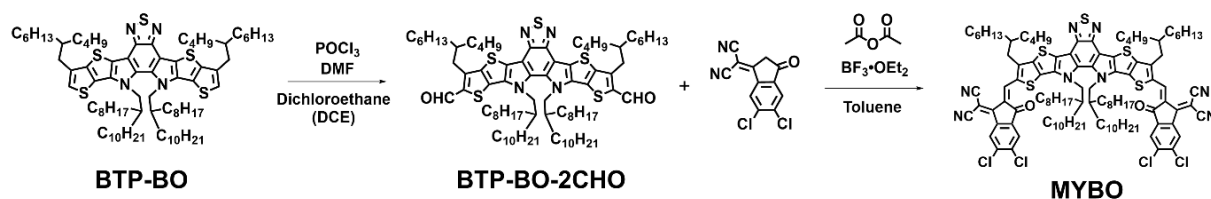

**Scheme S1.** Synthetic scheme for MYBO.

**(1) Synthesis of 3,9-bis(2-butylloctyl)-12,13-bis(2-octyldodecyl)-12,13-dihydro-[1,2,5]thiadiazolo[3,4-*e*]thieno[2'',3':4',5']thieno[2',3':4,5]pyrrolo[3,2-*g*]thieno[2',3':4,5]thieno[3,2-*b*]indole-2,10-dicarbaldehyde (BTP-BO-2CHO)**

0.20 g of BTP-BO (1.0 equiv.) was placed in a 20 mL microwave vial. The vial was subjected to vacuum conditions and subsequently purged with argon gas three times. 5 mL of dichloroethane was then added to fully dissolve the reactant. Following this, 0.14 mL of phosphorus oxychloride ( $\text{POCl}_3$ ; 10.0 equiv.) and 0.46 mL of *N,N*-dimethylformamide (DMF; 40.0 equiv.) were introduced into the solution. The resultant mixture was stirred vigorously for 12 hr at 60°C. After the reaction, the crude product was washed with water and extracted three times using dichloromethane. The residual solvent was removed using a rotary evaporator, and the crude material was purified by column chromatography, utilizing hexane and dichloromethane as eluents. The purified product was obtained as an orange liquid (0.20 g, yield: 96%).

$^1\text{H}$  NMR (400 MHz, methylene chloride- $d_2$ )  $\delta$  10.16 (s, 2H), 4.69 (d,  $J = 7.8$  Hz, 4H), 3.16 (d,  $J = 7.4$  Hz, 4H), 2.10 (s, 4H), 1.54–1.15 (m, 55H), 1.13–0.71 (m, 71H).

**(2) Synthesis of 2,2'-((2Z,2'Z)-((3,9-bis(2-butyloctyl)-12,13-bis(2-octyldodecyl)-12,13-dihydro-[1,2,5]thiadiazolo[3,4-e]thieno[2'',3'':4',5']thieno[2',3':4,5]pyrrolo[3,2-g]thieno[2',3':4,5]thieno[3,2-b]indole-2,10-diyl)bis(methaneylylidene))bis(5,6-dichloro-3-oxo-2,3-dihydro-1H-indene-2,1-diylidene))dimalononitrile (MYBO)**

0.20 g of BTP-BO-2CHO (1.0 equiv.) and 0.08 g of IC-2Cl (2.1 equiv.) were placed in a 20 mL microwave vial. The vial was evacuated under vacuum and then purged with argon gas three times. 10 mL of toluene was added to fully dissolve the reactants. Subsequently, 0.020 mL of boron trifluoride diethyl etherate (BF<sub>3</sub>•OEt<sub>2</sub>; 1.0 equiv.) and 0.014 mL of acetic anhydride (4.0 equiv.) were introduced into the solution. The resulting mixture was stirred vigorously for 2 hr at room temperature. After the reaction, the crude product was precipitated in 100 mL of methanol and filtered using filter paper. Then, the residual methanol in the filtered material was fully removed by vacuum. The crude materials were purified by column chromatography with hexane and chloroform as eluents. The purified product was obtained as a black solid (0.21 g, yield: 78%).

<sup>1</sup>H NMR (400 MHz, chloroform-*d*) δ 9.21 (s, 2H), 8.84 (s, 2H), 7.99 (s, 2H), 4.78 (d, *J* = 7.8 Hz, 4H), 3.22 (d, *J* = 7.6 Hz, 4H), 2.12 (s, 4H), 1.56–1.10 (m, 65H), 1.02 (d, *J* = 14.9 Hz, 33H), 0.85 (ddt, *J* = 17.0, 14.4, 7.1 Hz, 28H).

Calculated molar mass for MYBO (*M*<sub>calcd.</sub>) was 1882.45 g mol<sup>-1</sup> and estimated molar mass with MALDI-ToF (*M*<sub>MALDI-ToF</sub>) was 1882.39 g mol<sup>-1</sup>.

**Characterizations:** Bruker AVANCE NEO (9.4 T)-400 MHz spectrometer was used to obtain the proton nuclear magnetic resonance ( $^1\text{H}$  NMR) spectra of the materials, and the chemical shifts in the spectra have units of ppm. Matrix-assisted laser desorption/ionization time of flight (MALDI-ToF) spectra was measured by Autoflex maX from Bruker. The number-average molecular weight ( $M_n$ ) and dispersity ( $D$ ) of the polymer donor PTQ10 was measured using gel permeation chromatography (GPC) at  $80^\circ\text{C}$  using *ortho*-dichlorobenzene as an eluent, which was calibrated using polystyrene standard. The optimized molecular structures and the relaxed potential surface energy from bond rotation were computed using the density functional theory (DFT) method with the Becke three-parameter Lee-Yang-Parr (B3LYP) function and the 6-31G\* basis set via a modeling software (Gaussian 09).

Cyclic voltammetry (CV) was performed using a EG and G Parc model 273 Å potentiostat/galvanostat system in a 0.1 M tetrabutylammonium perchlorate solution with nitrogen degassed anhydrous acetonitrile as the supporting electrolyte, at a scan rate of  $50\text{ mV s}^{-1}$ . A glassy carbon electrode was used as the working electrode. A platinum wire was used as the counter electrode, and an Ag/AgCl electrode was used as the reference electrode. The redox couple ferricenium/ferrocene was used as external standard. HOMO and LUMO energy levels were estimated from cyclic voltammetry:  $E_{\text{HOMO}}$  (eV) =  $-(E_{\text{onset}}^{\text{ox.}} - E_{\text{onset}}^{\text{Fc/Fc}^+}) + E_{\text{HOMO}}^{\text{Fc}}$ ;  $E_{\text{LUMO}}$  (eV) =  $-(E_{\text{onset}}^{\text{red.}} - E_{\text{onset}}^{\text{Fc/Fc}^+}) + E_{\text{HOMO}}^{\text{Fc}}$ ;  $E_{\text{onset}}^{\text{Fc/Fc}^+} = 0.44\text{ eV}$ ,  $E_{\text{HOMO}}^{\text{Fc}} = -4.8\text{ eV}$ .

To determine the solubility, 10  $\mu\text{L}$  of eucalyptol (Eu) was incrementally added to a vial containing 3 mg of small molecule acceptors (SMAs) at room temperature.<sup>3</sup> The mixture was then heated to  $100^\circ\text{C}$  for 30 min. This procedure was repeated until the SMAs were completely dissolved, with no particles remaining in the solutions. The point at which this occurred was identified as the solubility threshold.

A UV-1800 spectrophotometer was used for the ultraviolet-visible (UV-Vis) absorption spectra. *In-situ* UV-Vis absorption spectra were obtained at intervals of every 0.05 s using an

HRR2000+CG spectrometer equipped with a DH-2000-BAL balanced deuterium tungsten light source. The OceanView spectroscopy software was utilized for conducting the measurements. The differential scanning calorimetry (DSC) profiles were recorded by TA Instruments DSC 25 with heating and cooling rates of 5 °C min<sup>-1</sup> from 20 to 330°C for L8-BO, while the DSC thermogram of MYBO was measured in the range of 20 to 270°C. The atomic force microscopy (AFM) images were measured by NX10 from Park Systems.

The resonant soft X-ray scattering (RSoXS) experiment was performed at beamline 11.0.1.2 in the S11 Advanced Light Source (United States). Blend films for the RSoXS measurement were prepared on a 100 nm-thick, 1.0 mm × 1.0 mm Si<sub>3</sub>N<sub>4</sub> membrane supported by a 200-μm thick, 5 mm × 5 mm silicon frame (Norcada Inc.). The domain size of a blend film was approximated to be half of the domain spacing (domain spacing =  $2\pi q_{\text{peak}}^{-1}$ ) from the RSoXS profile. The relative domain purity was estimated as the relative ratio of square-root of the integrated scattering intensity in the  $Iq^2$  vs.  $q$  plot. Grazing incidence wide-angle X-ray scattering (GIWAXS) measurements were conducted at the Pohang Accelerator Laboratory (beamline 3C, Republic of Korea), with incidence angles between 0.12 – 0.14°. Correlation length ( $L_c$ ) values of the crystallites were calculated using the Scherrer equation:

$$L_c = \frac{2\pi K}{\Delta q}$$

( $K$  (shape factor) = 0.9 and  $\Delta q$  = full width half maximum (FWHM) of the scatterings)

The relative degree of crystallinity (rDoC) and the information of packing orientation were determined from the pole figure of (010)  $\pi$ - $\pi$  stacking peak, which was background-subtracted and normalized by sample volume and X-ray irradiation time. rDoC values were calculated from the following equation:

$$\text{rDoC} \propto \int_0^{\frac{\pi}{2}} I(w) \sin(w) dw$$



where  $\omega$  is the polar angle,  $I(\omega)$  is the scattering, and  $\sin(\omega)$  is the geometrical correction factor.

**Space-charge limited current (SCLC) mobility measurements:** The hole mobilities ( $\mu_h$ ) for blend films and the electron mobilities ( $\mu_e$ ) of the neat SMA films and blend films were estimated from the SCLC method. For measuring  $\mu_h$  values of devices, the device structure was ITO/ poly(3,4-ethylenedioxythiophene):poly(styrenesulfonate) (PEDOT:PSS)/active layer/Au. For measuring  $\mu_e$  values of devices, the device configuration of ITO/ZnO/active layer or pristine SMA/poly[9,9-bis(3'-(*N,N*-dimethyl)-*N*-ethylammonium-propyl-2,7-fluorene)-*alt*-2,7-(9,9-dioctylfluorene)]dibromide (PFN-Br)/Al was used. The preparation for active layers followed the same conditions as those described for the OSC fabrications. The current-voltage measurements were conducted with the applied voltage range of 0 to 6 V, and the obtained results were fitted using the Mott-Gurney law.

$$J = \frac{9\varepsilon_r\varepsilon_0\mu V^2}{8L^3}$$

where  $J$  denotes the current density,  $\varepsilon_r$  represents the relative dielectric constant of the films,  $\varepsilon_0$  exhibits the permittivity of free space ( $8.85 \times 10^{-14}$  F cm<sup>-1</sup>),  $\mu$  is the charge carrier (hole or electron) mobility,  $V$  is the calculated potential across the SCLC device ( $V = V_{\text{applied}} - V_{\text{bi}} - V_r$ , where  $V_{\text{bi}}$  is the built-in state potential and  $V_r$  is the voltage drop resulting from resistance), and  $L$  is the thickness of the blend or pristine films measured by AFM.

**Summation of LD50 in terpene mixture:** To estimate the total LD50 from terpene mixture (co-solvent, solvent additive, etc.), the acute toxicity estimate (ATE) of mixture was calculated using the following equation:

$$\frac{100}{\text{ATE}_{\text{mix}}} = \sum_n \frac{C_i}{\text{ATE}_i}$$

where  $ATE_{mix}$  is the total LD50 for mixture,  $C_i$  is the concentration of solvent  $i$ ,  $n$  is the number of solvents, and  $ATE_i$  is the LD50 of solvent.<sup>4</sup>

***Organic Solar Cell (OSC) Fabrication and Characterization:*** The OSCs with a conventional architecture of indium tin oxide (ITO)/PEDOT:PSS/active layer/PNDIT-F3N-Br/Ag were prepared with the following procedures. ITO-coated glass substrates were treated by ultrasonication with acetone, deionized water, and isopropyl alcohol. Then, the ITO substrates were dried for 6 hr in an oven (70°C) at an ambient pressure, and then plasma treated for 10 min. Spin-coating of the PEDOT:PSS solution (Clevios, AI4083) was performed at 3500 rpm for 30 s onto the ITO substrates. Then, the film/substrate was annealed in the air at 160°C for 15 min before transferring into an N<sub>2</sub>-filled glovebox. The active layer solution for the PTQ10:SMA blend system consisting the 1:1.2 weight ratio of donor to acceptor was prepared as 16.0 mg mL<sup>-1</sup> concentration in chloroform (CF) without additive spin-coated onto the PEDOT:PSS/ITO substrate at 50°C to form an active layer with a thickness of ~110 nm. Processed from Eu, the active layer solutions were prepared as 30.0 mg mL<sup>-1</sup> concentration with the condition of spin-coating at 4000 rpm for 80 s at 100°C. Then, the samples were dried with high vacuum (<10<sup>-6</sup> torr) for 1 hr and annealed at 100°C for 10 min. PNDIT-F3N-Br in methanol (1 mg mL<sup>-1</sup>) was then spin-coated with the condition of 3000 rpm for 30 s. Finally, Ag (120 nm) was deposited under high vacuum (<10<sup>-6</sup> Torr) in an evaporation chamber. For testing the air-stability of OSC fabricated under ambient condition, the OSCs with an inverted configuration (ITO/zinc oxide (ZnO)/active layer/MoO<sub>3</sub>/Ag) were prepared. The first procedure is plasma treatment for 10 min, then the ITO substrate was spin coated with ZnO at 4000 rpm for 30 s. The ZnO-coated ITO was thermally annealed at 215°C for 10 min. The active layer solution is same with normal type of OSCs, and for hole transporting layer, MoO<sub>3</sub> (10 nm) was deposited on the active layer/substrate. Lastly, Ag (120 nm) was deposited using

the evaporation chamber under the high vacuum conditions. Optical microscopy (OM) was used to measure the exact photoactive area of the mask ( $0.04 \text{ cm}^2$ ). Keithley 2400 SMU instrument was used to measure the PCE values under an Air Mass 1.5 G solar simulator ( $100 \text{ mW cm}^{-2}$ , solar simulator: K201 LAB55, McScience), satisfying the Class AAA, ASTM Standards. K801SK302 of McScience was used as a standard silicon reference cell to calibrate the exact solar intensity. The reference cell was calibrated every 3 months, and the most recent calibration date was August 19, 2024. K3100 IQX, McScience Inc. instrument was used to analyze the EQE spectra, equipped with a monochromator (Newport) and an optical chopper (MC 2000 Thorlabs).

***Air stability test of the OSCs:*** To measure air stability, the OSCs were fabricated in air and stored under ambient and dark conditions without encapsulation. The OSCs, which had a complete device structure (ITO/ZnO/active layer/MoO<sub>3</sub>/Ag) and were not encapsulated, were measured with the same instrument and method as described above.

## Supplementary Figures & Tables

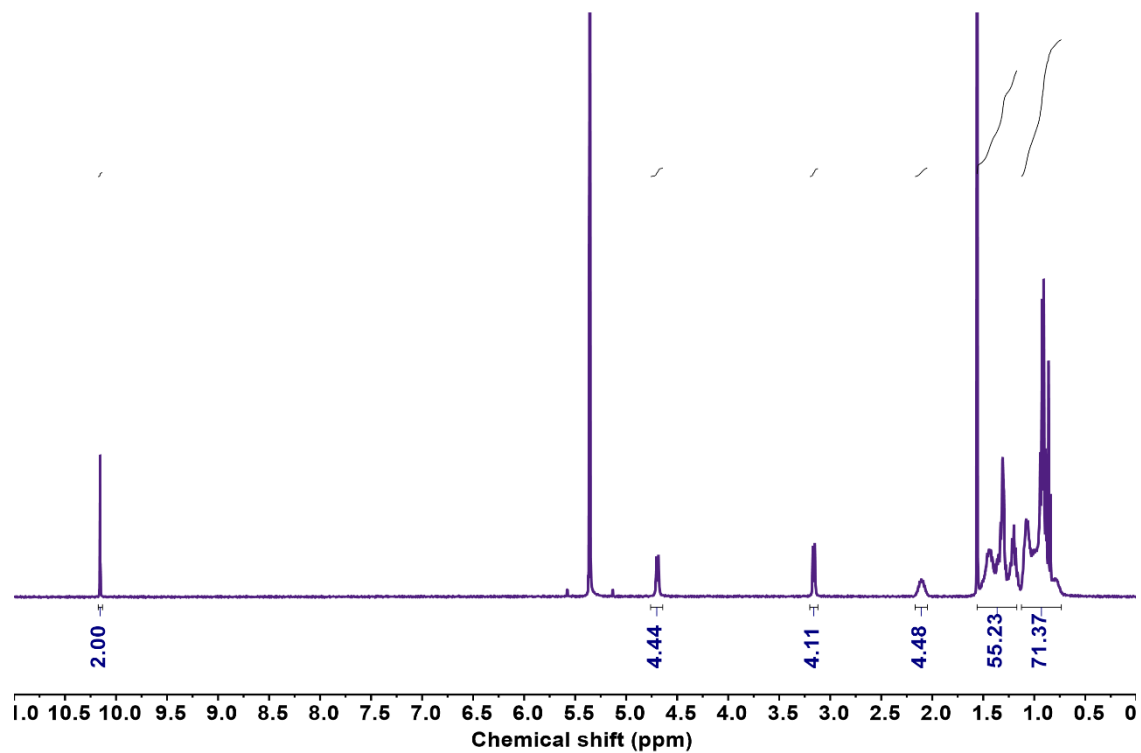

**Fig. S1.**  $^1\text{H}$  NMR spectrum of BTP-BO-2CHO in methylene chloride- $d_2$ .

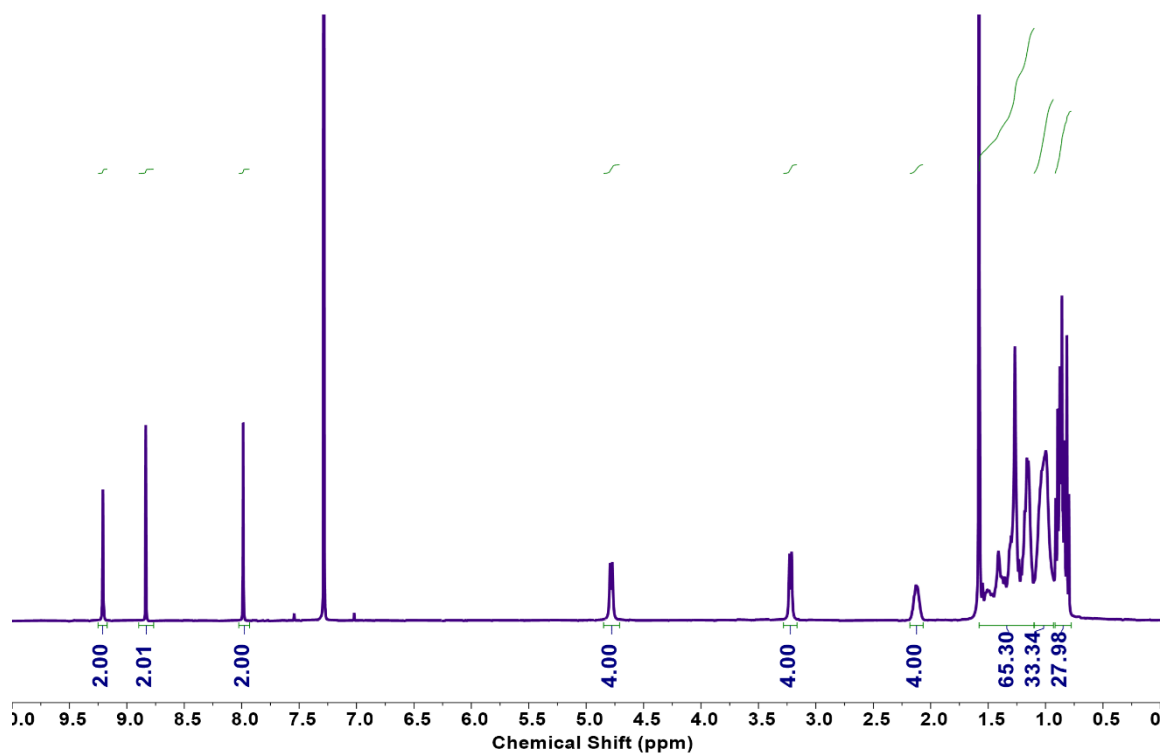

**Fig. S2.**  $^1\text{H}$  NMR spectrum of MYBO in chloroform- $d_2$ .

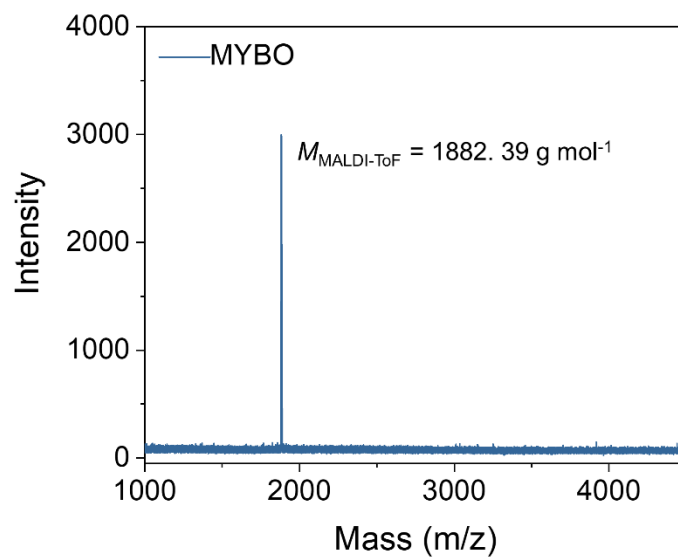

**Fig. S3.** MALDI-ToF spectrum of MYBO.

**Table S1.** Molecular weight information of PTQ10 donor measured by GPC at 80°C using *ortho*-dichlorobenzene as eluent.

| Polymer | $M_n$<br>[kg mol <sup>-1</sup> ] | $\mathcal{D}$ |
|---------|----------------------------------|---------------|
|         | 33.2                             | 3.5           |
| PTQ10   | 26.3                             | 3.8           |
|         | 20.6                             | 3.6           |

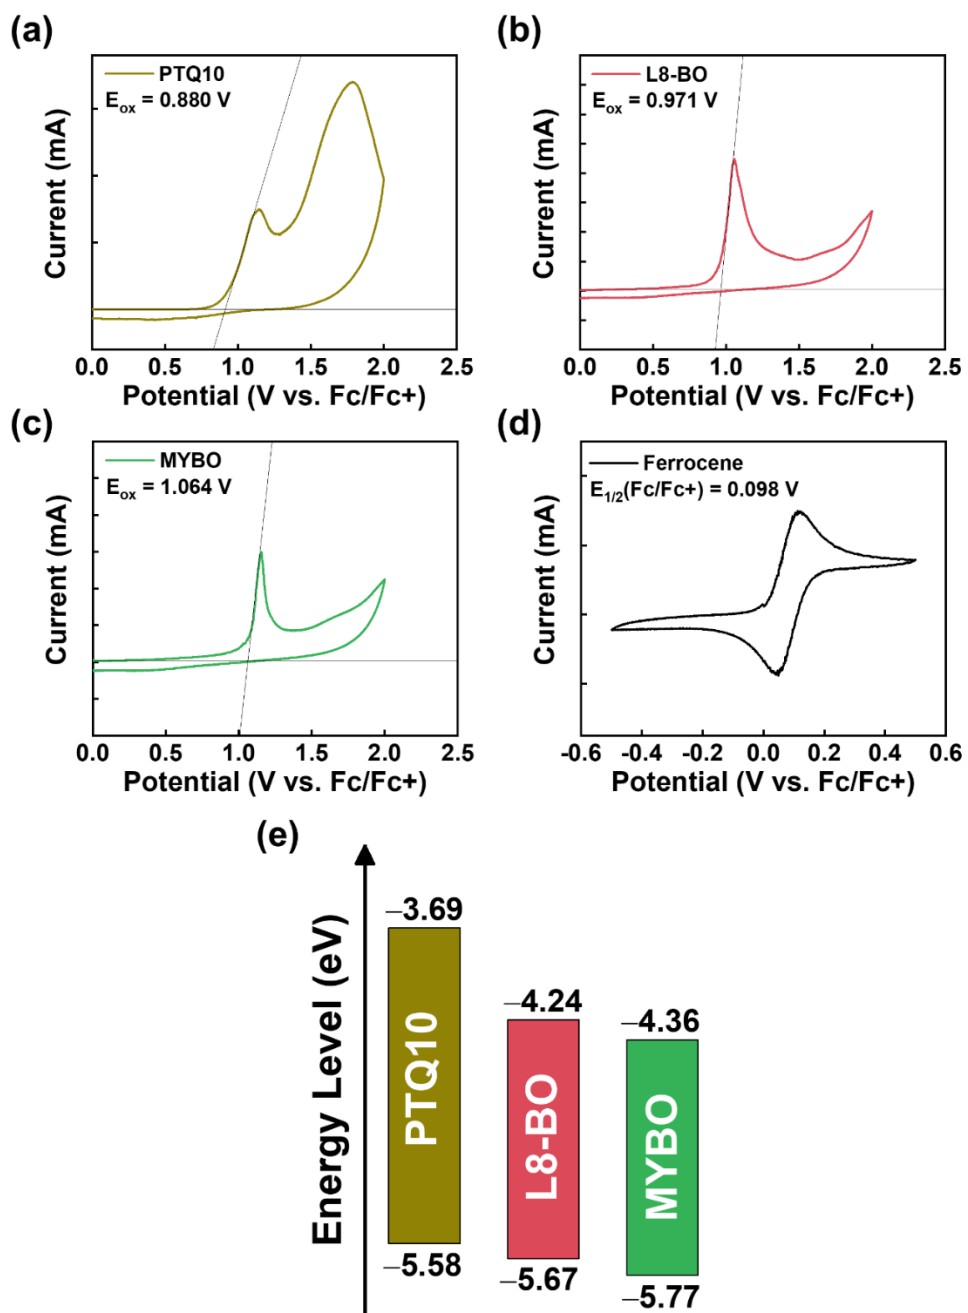

**Fig. S4.** CVs of (a) PTQ10 donor, (b) L8-BO, (c) MYBO, and (d) ferrocene. (e) Energy levels of PTQ10 and SMAs.

**Table S2.** Calculation of HSPs of PTQ10 with functional group contribution terms.

| Functional Group   | Occurrence | $\sum V$<br>[cm <sup>3</sup> mol <sup>-1</sup> ] | $\sum F_{di}$<br>[J <sup>1/2</sup> cm <sup>3/2</sup> mol <sup>-1</sup> ] | $\sum F_{pi}$<br>[J <sup>1/2</sup> cm <sup>3/2</sup> mol <sup>-1</sup> ] | $\sum U_{hi}$<br>[J mol <sup>-1</sup> ] |
|--------------------|------------|--------------------------------------------------|--------------------------------------------------------------------------|--------------------------------------------------------------------------|-----------------------------------------|
| -S-                | 1          | 8                                                | 454                                                                      | 362                                                                      | 221                                     |
| -F                 | 2          | 36                                               | 442                                                                      | 1084                                                                     | 0                                       |
| =N-                | 2          | 8                                                | 328                                                                      | 2646                                                                     | 3518                                    |
| -O-                | 1          | 3.8                                              | 100                                                                      | 401                                                                      | 1467                                    |
| -CH <sub>3</sub>   | 2          | 63.4                                             | 838                                                                      | 0                                                                        | 0                                       |
| -CH <sub>2</sub> - | 13         | 215.8                                            | 3510                                                                     | 0                                                                        | 0                                       |
| >CH-               | 1          | -1                                               | 80                                                                       | 0                                                                        | 0                                       |
| >C=                | 9          | -51.3                                            | 405                                                                      | 630                                                                      | 1287                                    |
| =CH-               | 3          | 37.2                                             | 669                                                                      | 210                                                                      | 429                                     |
| Total              |            | 319.9                                            | 6826                                                                     | 5333                                                                     | 6922                                    |

From the calculation above  $\delta_D$ ,  $\delta_P$ , and  $\delta_H$  values were estimated to be 21.34 MPa<sup>1/2</sup>, 0.23 MPa<sup>1/2</sup>, 4.65 MPa<sup>1/2</sup>, respectively, with Hoftyzer and van Krevelen method.<sup>5</sup>

**Table S3.** Calculation of HSPs of L8-BO with functional group contribution terms.

| Functional Group   | Occurrence | $\sum V$<br>[cm <sup>3</sup> mol <sup>-1</sup> ] | $\sum F_{di}$<br>[J <sup>1/2</sup> cm <sup>3/2</sup> mol <sup>-1</sup> ] | $\sum F_{pi}$<br>[J <sup>1/2</sup> cm <sup>3/2</sup> mol <sup>-1</sup> ] | $\sum U_{hi}$<br>[J mol <sup>-1</sup> ] |
|--------------------|------------|--------------------------------------------------|--------------------------------------------------------------------------|--------------------------------------------------------------------------|-----------------------------------------|
| -S-                | 5          | 40                                               | 2270                                                                     | 1810                                                                     | 1105                                    |
| -CO-               | 2          | 20                                               | 582                                                                      | 1538                                                                     | 1956                                    |
| -F                 | 4          | 72                                               | 884                                                                      | 2168                                                                     | 0                                       |
| -CN                | 4          | 89.6                                             | 1720                                                                     | 4404                                                                     | 4884                                    |
| >N-                | 2          | -18                                              | 62                                                                       | 298                                                                      | 732                                     |
| =N-                | 2          | 8                                                | 328                                                                      | 2646                                                                     | 3518                                    |
| -CH <sub>3</sub>   | 8          | 253.6                                            | 3352                                                                     | 0                                                                        | 0                                       |
| -CH <sub>2</sub> - | 28         | 464.8                                            | 7560                                                                     | 0                                                                        | 0                                       |
| >CH-               | 4          | -4                                               | 320                                                                      | 0                                                                        | 0                                       |
| >C=                | 32         | -182.4                                           | 1440                                                                     | 2240                                                                     | 4576                                    |
| =CH-               | 6          | 74.4                                             | 1338                                                                     | 420                                                                      | 858                                     |
| Total              |            | 818                                              | 19856                                                                    | 15524                                                                    | 17629                                   |

From the calculation above  $\delta_D$ ,  $\delta_P$ , and  $\delta_H$  values were estimated to be 24.27 MPa<sup>1/2</sup>, 0.15 MPa<sup>1/2</sup>, 4.64 MPa<sup>1/2</sup>, respectively, with Hoftyzer and van Krevelen method.<sup>5</sup>



**Table S4.** Calculation of HSPs of MYBO with functional group contribution terms.

| Functional Group   | Occurrence | $\sum V$<br>[cm <sup>3</sup> mol <sup>-1</sup> ] | $\sum F_{di}$<br>[J <sup>1/2</sup> cm <sup>3/2</sup> mol <sup>-1</sup> ] | $\sum F_{pi}$<br>[J <sup>1/2</sup> cm <sup>3/2</sup> mol <sup>-1</sup> ] | $\sum U_{hi}$<br>[J mol <sup>-1</sup> ] |
|--------------------|------------|--------------------------------------------------|--------------------------------------------------------------------------|--------------------------------------------------------------------------|-----------------------------------------|
| -S-                |            | 40                                               | 2270                                                                     | 1810                                                                     | 1105                                    |
| -CO-               | 2          | 20                                               | 582                                                                      | 1538                                                                     | 1956                                    |
| -Cl                |            | 101.2                                            | 1676                                                                     | 2456                                                                     | 820                                     |
| -CN                | 4          | 89.6                                             | 1720                                                                     | 4404                                                                     | 4884                                    |
| >N-                | 2          | -18                                              | 62                                                                       | 298                                                                      | 732                                     |
| =N-                | 2          | 8                                                | 328                                                                      | 2646                                                                     | 3518                                    |
| -CH <sub>3</sub>   | 8          | 253.6                                            | 3352                                                                     | 0                                                                        | 0                                       |
| -CH <sub>2</sub> - | 52         | 863.2                                            | 14040                                                                    | 0                                                                        | 0                                       |
| >CH-               | 4          | -4                                               | 320                                                                      | 0                                                                        | 0                                       |
| >C=                | 32         | -182.4                                           | 1440                                                                     | 2240                                                                     | 4576                                    |
| =CH-               | 6          | 74.4                                             | 1338                                                                     | 420                                                                      | 858                                     |
| Total              |            | 1245.6                                           | 27128                                                                    | 15812                                                                    | 18449                                   |

From the calculation above  $\delta_D$ ,  $\delta_P$ , and  $\delta_H$  values were estimated to be 21.78 MPa<sup>1/2</sup>, 0.10 MPa<sup>1/2</sup>, 3.85 MPa<sup>1/2</sup>, respectively, with Hoftyzer and van Krevelen method.<sup>5</sup>



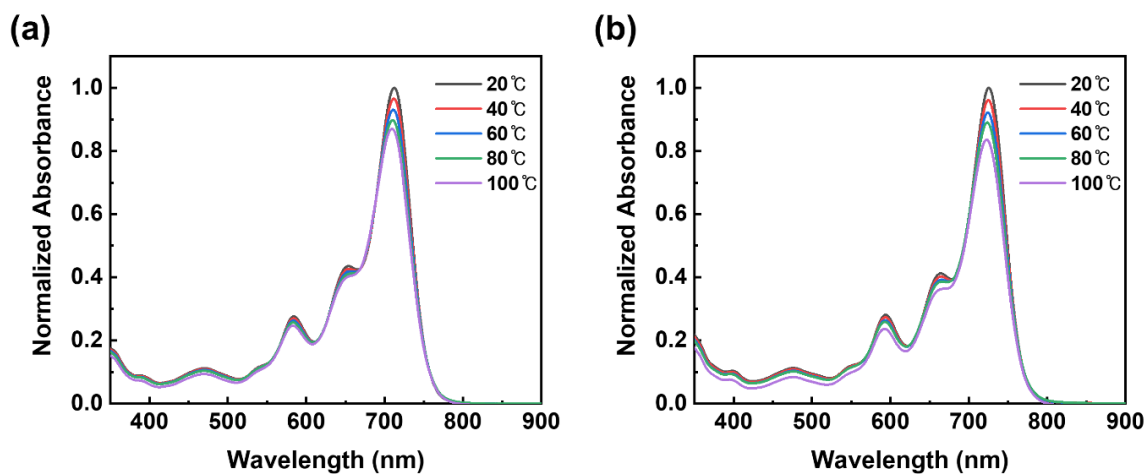

**Fig. S7.** UV–Vis absorption spectra of pristine solution (a) L8-BO, and (b) MYBO in toluene at different temperatures.

**Table S5.** Optical properties of pristine SMA films with toluene (Tol) and Eu.

| Material    | $I_{max}^{100^{\circ}C} / I_{max}^{20^{\circ}C}$ |
|-------------|--------------------------------------------------|
| L8-BO (Tol) | 0.87                                             |
| L8-BO (Eu)  | 1.82                                             |
| MYBO (Tol)  | 0.84                                             |
| MYBO (Eu)   | 0.91                                             |

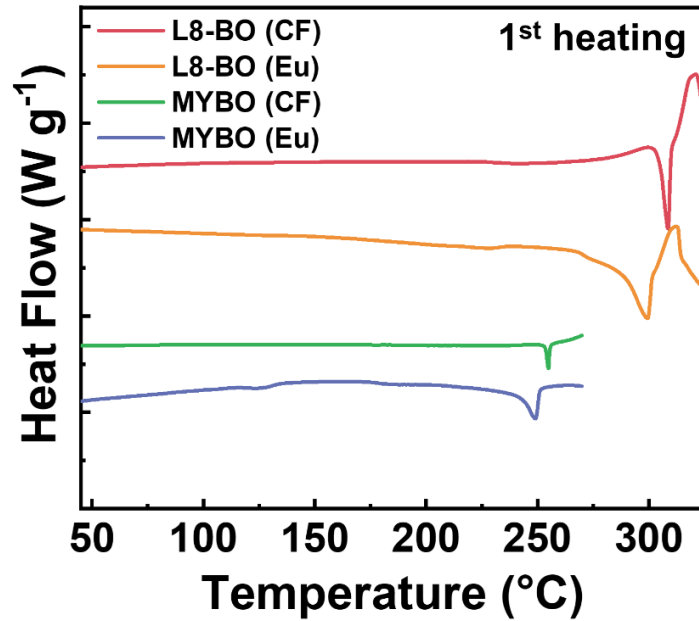

**Fig. S8.** DSC thermograms of pristine SMA films with different processing solvents obtained during the 1<sup>st</sup> heating cycle.

**Table S6.** DSC results and SCLC electron mobilities of the pristine SMA films.

| SMA        | $T_m$<br>[°C] | $\Delta H_m$<br>[J g <sup>-1</sup> ] | $\mu_e^a$<br>[cm <sup>2</sup> V <sup>-1</sup> s <sup>-1</sup> ] |
|------------|---------------|--------------------------------------|-----------------------------------------------------------------|
| L8-BO (CF) | 309           | 35.1                                 | $1.7 \times 10^{-4}$                                            |
| L8-BO (Eu) | 299           | 51.2                                 | $8.8 \times 10^{-7}$                                            |
| MYBO (CF)  | 255           | 8.1                                  | $1.2 \times 10^{-4}$                                            |
| MYBO (Eu)  | 249           | 18.9                                 | $1.1 \times 10^{-4}$                                            |

<sup>a</sup>Average values obtained from at least 3 independent devices.

**Table S7.** Photovoltaic performances of PTQ10:L8-BO-based OSCs processed from CF with different solution temperature and thickness.

| Solution Temperature [°C] | Spin-coating Speed [rpm] | $V_{oc}$ [V] | $J_{sc}$ [mA cm <sup>-2</sup> ] | FF   | $PCE_{max}$ ( $PCE_{avg}$ ) [%] |
|---------------------------|--------------------------|--------------|---------------------------------|------|---------------------------------|
| 20                        | 3000                     | 0.90         | 24.35                           | 0.62 | 13.58 (13.09)                   |
| 35                        | 3000                     | 0.91         | 24.39                           | 0.63 | 13.94 (13.70)                   |
| 50                        | 3000                     | 0.91         | 24.64                           | 0.64 | 14.45 (14.16)                   |
| 50                        | 4500                     | 0.93         | 24.06                           | 0.67 | 15.04 (14.74)                   |

**Table S8.** Photovoltaic performances of PTQ10:MYBO-based OSCs processed from CF with different solution temperature.

| Solution Temperature [°C] | $V_{oc}$ [V] | $J_{sc}$ [mA cm <sup>-2</sup> ] | FF   | $PCE_{max}$ ( $PCE_{avg}$ ) [%] |
|---------------------------|--------------|---------------------------------|------|---------------------------------|
| 20                        | 0.88         | 24.22                           | 0.59 | 12.59 (12.22)                   |
| 35                        | 0.90         | 24.81                           | 0.61 | 13.52 (13.26)                   |
| 50                        | 0.90         | 23.62                           | 0.67 | 14.34 (13.81)                   |

**Table S9.** Photovoltaic performances of PTQ10:MYBO-based OSCs processed from CF with different thickness.

| Concentration [mg mL <sup>-1</sup> ] | Spin-coating Speed [rpm] | $V_{oc}$ [V] | $J_{sc}$ [mA cm <sup>-2</sup> ] | FF   | $PCE_{max}$ ( $PCE_{avg}$ ) [%] | Thickness [nm] |
|--------------------------------------|--------------------------|--------------|---------------------------------|------|---------------------------------|----------------|
| 16                                   | 1200                     | 0.89         | 24.67                           | 0.51 | 11.13 (10.71)                   | 155 ± 4        |
|                                      | 2000                     | 0.90         | 24.76                           | 0.62 | 13.71 (13.51)                   | 123 ± 3        |
|                                      | 3000                     | 0.91         | 24.91                           | 0.65 | 14.84 (14.81)                   | 111 ± 4        |
|                                      | 4500                     | 0.90         | 23.22                           | 0.63 | 13.27 (12.82)                   | 77 ± 4         |

**Table S10.** Photovoltaic performances of PTQ10:MYBO-based OSCs processed from Eu with different solution temperature.

| <b>Solution Temperature [°C]</b> | <b><math>V_{oc}</math> [V]</b> | <b><math>J_{sc}</math> [mA cm<sup>-2</sup>]</b> | <b>FF</b> | <b>PCE<sub>max</sub> (PCE<sub>avg</sub>) [%]</b> |
|----------------------------------|--------------------------------|-------------------------------------------------|-----------|--------------------------------------------------|
| <b>20</b>                        | 0.82                           | 20.28                                           | 0.46      | 7.59 (6.74)                                      |
| <b>40</b>                        | 0.83                           | 20.70                                           | 0.53      | 8.99 (7.62)                                      |
| <b>60</b>                        | 0.88                           | 21.57                                           | 0.59      | 11.20 (10.35)                                    |
| <b>80</b>                        | 0.87                           | 21.70                                           | 0.65      | 12.21 (11.77)                                    |
| <b>100</b>                       | 0.88                           | 23.15                                           | 0.64      | 13.11 (12.56)                                    |
| <b>120</b>                       | 0.88                           | 22.56                                           | 0.61      | 12.12 (12.00)                                    |
| <b>140</b>                       | 0.88                           | 21.09                                           | 0.65      | 12.03 (11.49)                                    |

**Table S11.** Photovoltaic performances of PTQ10:MYBO-based OSCs processed from Eu with different molecular weight of PTQ10.

| <b>PTQ10 <math>M_n</math> [kg mol<sup>-1</sup>]</b> | <b><math>V_{oc}</math> [V]</b> | <b><math>J_{sc}</math> [mA cm<sup>-2</sup>]</b> | <b>FF</b> | <b>PCE<sub>max</sub> (PCE<sub>avg</sub>) [%]</b> |
|-----------------------------------------------------|--------------------------------|-------------------------------------------------|-----------|--------------------------------------------------|
| <b>21</b>                                           | 0.89                           | 23.10                                           | 0.61      | 12.54 (12.09)                                    |
| <b>26</b>                                           | 0.88                           | 23.85                                           | 0.64      | 13.31 (12.32)                                    |
| <b>33</b>                                           | 0.88                           | 24.67                                           | 0.65      | 14.02 (13.55)                                    |

**Table S12.** Photovoltaic performances of PTQ10:MYBO-based OSCs processed from Eu with different thickness.

| Concentration<br>[mg mL <sup>-1</sup> ] | Spin-coating<br>Speed<br>[rpm] | V <sub>OC</sub><br>[V] | J <sub>SC</sub><br>[mA cm <sup>-2</sup> ] | FF   | PCE <sub>max</sub><br>(PCE <sub>avg</sub> ) [%] | Thickness<br>[nm] |
|-----------------------------------------|--------------------------------|------------------------|-------------------------------------------|------|-------------------------------------------------|-------------------|
| 30                                      | 1500                           | 0.87                   | 24.86                                     | 0.55 | 11.84 (11.09)                                   | 149 ± 2           |
|                                         | 2500                           | 0.87                   | 25.24                                     | 0.60 | 13.18 (12.63)                                   | 130 ± 6           |
|                                         | 4000                           | 0.88                   | 24.67                                     | 0.65 | 14.02 (13.55)                                   | 105 ± 1           |
|                                         | 6000                           | 0.88                   | 20.72                                     | 0.66 | 12.04 (11.36)                                   | 87 ± 4            |

**Table S13.** Photovoltaic performances of PTQ10:MYBO-based OSCs processed from Eu with different thermal annealing temperature and time.

| Temperature and Time | V <sub>OC</sub><br>[V] | J <sub>SC</sub><br>[mA cm <sup>-2</sup> ] | FF   | PCE <sub>max</sub><br>(PCE <sub>avg</sub> ) [%] |
|----------------------|------------------------|-------------------------------------------|------|-------------------------------------------------|
| 140°C 5 min          | 0.90                   | 20.34                                     | 0.68 | 12.48 (12.08)                                   |
| 120°C 5 min          | 0.89                   | 22.82                                     | 0.68 | 13.74 (13.28)                                   |
| 100°C 5 min          | 0.89                   | 24.39                                     | 0.68 | 14.79 (14.23)                                   |
| 100°C 10 min         | 0.88                   | 25.23                                     | 0.69 | 15.14 (14.71)                                   |

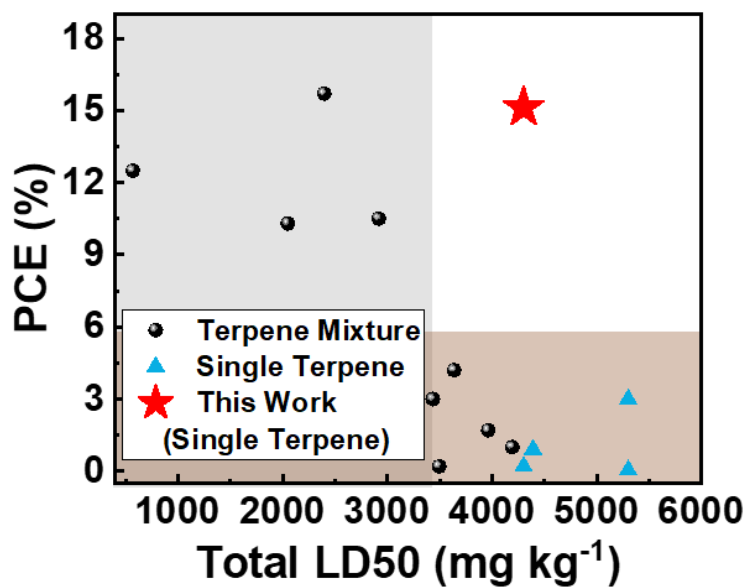

**Fig. S9.** Summary of PCEs of terpene-based OSCs depending on the total LD50 value from the literature and this work. Total LD50 was calculated by summation of the ATE value.<sup>4</sup>



**Table S14.** Comparison of the PCE values of the reported terpene-based OSCs (single terpene (Single), terpene + additive (Additive) and terpene mixtures (Mixture)) and this work.

| <b>System</b>                    | <b>Solvent Type</b> | <b>Solvent</b>                          | <b>Volume Ratio</b> | <b>PCE<sub>max</sub> [%]</b> | <b>Ref.</b>      |
|----------------------------------|---------------------|-----------------------------------------|---------------------|------------------------------|------------------|
| <b>PTQ10:MYBO</b>                | <b>Single</b>       | <b>Eu</b>                               | <b>100</b>          | <b>15.14</b>                 | <b>This work</b> |
| <b>FTAZ:IT-M</b>                 | <b>Single</b>       | Limonene                                | 100                 | 0.05                         | 6                |
| <b>PBDTTPD:PC<sub>61</sub>BM</b> | <b>Single</b>       | Eu                                      | 100                 | 0.20                         | 7                |
| <b>PTB7:PC<sub>71</sub>BM</b>    | <b>Single</b>       | Terpinolene                             | 100                 | 0.91                         | 8                |
| <b>PTzBI-Si:PNDICI</b>           | <b>Single</b>       | Limonene                                | 100                 | 3.00                         | 9                |
| <b>PBDTTPD:PC<sub>61</sub>BM</b> | <b>Mixture</b>      | Eu:benzaldehyde                         | 90:10               | 0.20                         | 7                |
|                                  | <b>Additive</b>     | Eu: <i>p</i> -anisaldehyde              | 98:2                | 1.00                         |                  |
|                                  | <b>Mixture</b>      | Eu:1-chloronaphthalene                  | 95:5                | 1.70                         |                  |
|                                  | <b>Mixture</b>      | Eu:benzaldehyde: <i>p</i> -anisaldehyde | 88:10:2             | 3.00                         |                  |
| <b>P2F-Si:PNDICI</b>             | <b>Additive</b>     | Limonene: $\gamma$ -valerolactone       | 99.5:0.5            | 4.20                         | 9                |
| <b>PM6:BTP-eC9</b>               | <b>Mixture</b>      | Menthone:tetralin                       | 55:45               | 10.30                        | 10               |
|                                  | <b>Mixture</b>      | Limonene:indan                          | 58:42               | 10.50                        |                  |
|                                  | <b>Mixture</b>      | Eu:tetralin                             | 52:48               | 15.70                        |                  |

**Table S15.** SCLC mobilities for the PTQ10:SMA blend films.

| SMA        | $\mu_e^a$<br>[cm <sup>2</sup> V <sup>-1</sup> s <sup>-1</sup> ] | $\mu_h^a$<br>[cm <sup>2</sup> V <sup>-1</sup> s <sup>-1</sup> ] | $\mu_e/\mu_h$ |
|------------|-----------------------------------------------------------------|-----------------------------------------------------------------|---------------|
| L8-BO (CF) | $6.9 \times 10^{-4}$                                            | $3.5 \times 10^{-4}$                                            | 1.97          |
| L8-BO (Eu) | $4.0 \times 10^{-6}$                                            | $1.5 \times 10^{-4}$                                            | 0.03          |
| MYBO (CF)  | $6.1 \times 10^{-4}$                                            | $3.7 \times 10^{-4}$                                            | 1.65          |
| MYBO (Eu)  | $5.9 \times 10^{-4}$                                            | $3.6 \times 10^{-4}$                                            | 1.64          |

<sup>a</sup>Average values obtained from at least 3 independent devices.

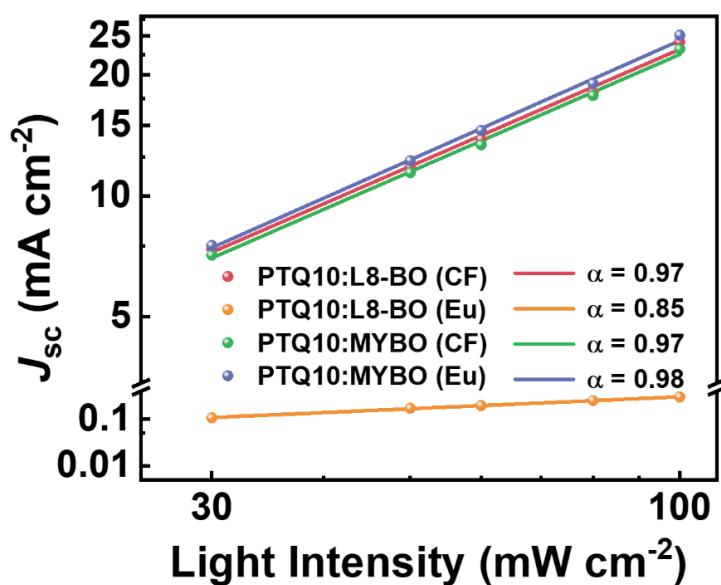

**Fig. S10.** Light intensity-dependent  $J_{sc}$  plots of PTQ10-based OSCs.

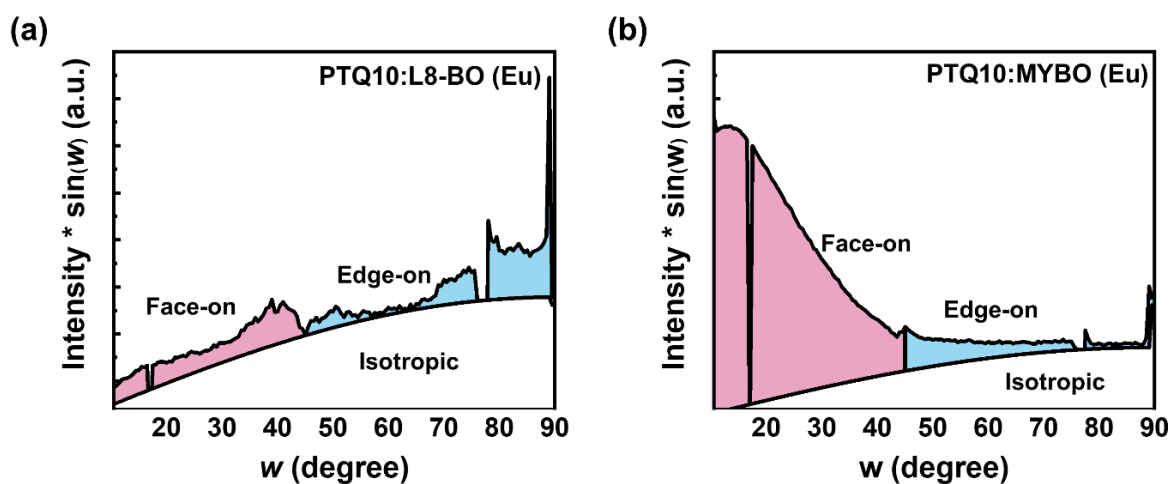

**Fig. S11.** Orientation of crystalline domains in (a) L8-BO, and (b) MYBO-based blends processed from Eu.

**Table S16.** Packing orientation of the blends.

|                        | PTQ10:L8-BO (Eu) | PTQ10:MYBO (Eu) |
|------------------------|------------------|-----------------|
| Face-on fraction (%)   | 8.7              | 51.3            |
| Edge-on fraction (%)   | 10.4             | 5.7             |
| Isotropic fraction (%) | 80.9             | 43.0            |

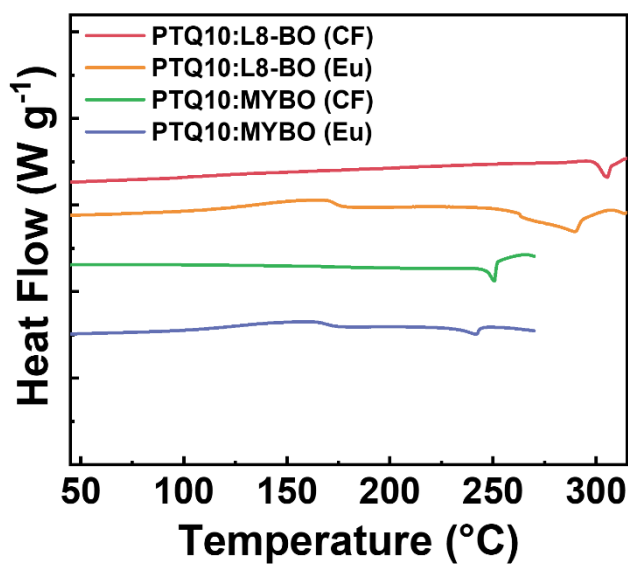

**Fig. S12.** DSC thermograms of blend films with different processing solvents obtained during the 1<sup>st</sup> heating cycle.

**Table S17.** Optical properties and DSC results of blend films.

| Active layer<br>(PTQ10-based) | $T_m$<br>[°C] | $\Delta H_m$<br>[J g <sup>-1</sup> ] |
|-------------------------------|---------------|--------------------------------------|
| L8-BO (CF)                    | 306           | 21.3                                 |
| L8-BO (Eu)                    | 290           | 48.3                                 |
| MYBO (CF)                     | 251           | 7.4                                  |
| MYBO (Eu)                     | 242           | 9.8                                  |

**Table S18.** Saturation times of the absorption of the PTQ10:MYBO in Eu with different processing condition.

| <b>Concentration</b><br>[mg mL <sup>-1</sup> ] | <b>Spin-coating</b><br><b>Speed</b><br>[rpm] | $\tau_{\text{sat}}^{\text{PTQ10}}$<br>[s] | $\tau_{\text{sat}}^{\text{MYBO}}$<br>[s] | <b>Thickness</b><br>[nm] |
|------------------------------------------------|----------------------------------------------|-------------------------------------------|------------------------------------------|--------------------------|
| <b>14</b>                                      | <b>1800</b>                                  | 33.20                                     | 33.85                                    | 108 ± 1                  |
| <b>20</b>                                      | <b>2500</b>                                  | 29.50                                     | 30.90                                    | 106 ± 2                  |
| <b>30</b>                                      | <b>4000</b>                                  | 23.70                                     | 26.30                                    | 105 ± 1                  |

**Table S19.** Photovoltaic performance of PTQ10:MYBO in Eu.

| <b>System</b>                    | <b>Processing Condition</b>      | $V_{\text{oc}}$<br>[V] | $J_{\text{sc}}$<br>[mA cm <sup>-2</sup> ] | <b>FF</b> | $\text{PCE}_{\text{max}}$<br>[%] |
|----------------------------------|----------------------------------|------------------------|-------------------------------------------|-----------|----------------------------------|
| <b>PTQ10:MYBO</b><br><b>(Eu)</b> | <b>Glove box (N<sub>2</sub>)</b> | 0.88                   | 25.23                                     | 0.69      | 15.14                            |
|                                  | <b>Ambient</b>                   | 0.88                   | 24.42                                     | 0.68      | 14.66                            |

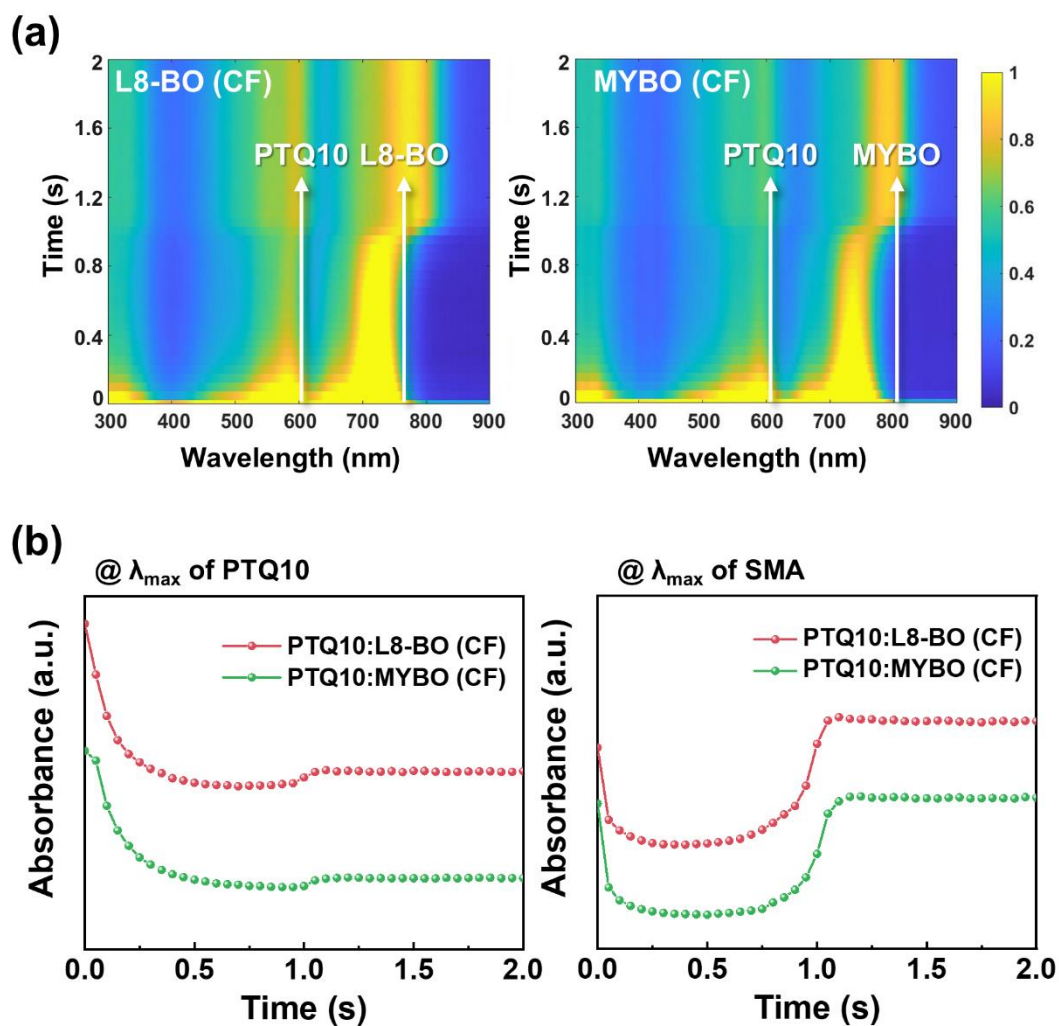

**Fig. S13.** (a) 2D contour maps of *in-situ* UV-Vis absorption spectra of PTQ10:SMA systems processed with CF and their (b) changes in absorbance at the  $\lambda_{\max}$  of PTQ10 and SMA.

**Table S20.** Saturation times of the absorption of the PTQ10:SMAs in CF.

| SMA   | $\tau_{\text{sat}}^{\text{PTQ10}}$<br>[s] | $\tau_{\text{sat}}^{\text{SMA}}$<br>[s] |
|-------|-------------------------------------------|-----------------------------------------|
| L8-BO | 1.10                                      | 1.10                                    |
| MYBO  | 1.15                                      | 1.15                                    |

## References

1. C. Sun, F. Pan, H. Bin, J. Zhang, L. Xue, B. Qiu, Z. Wei, Z.-G. Zhang and Y. Li, *Nat. Commun.*, 2018, **9**, 743.
2. Z. Wu, C. Sun, S. Dong, X.-F. Jiang, S. Wu, H. Wu, H.-L. Yip, F. Huang and Y. Cao, *J. Am. Chem. Soc.*, 2016, **138**, 2004-2013.
3. T. N.-L. Phan, J.-W. Lee, E. S. Oh, S. Lee, C. Lee, T.-S. Kim, S. Li and B. J. Kim, *ACS Appl. Mater. Interfaces*, 2022, **14**, 57070-57081.
4. J. Hamm, D. Allen, P. Ceger, T. Flint, A. Lowit, L. O'Dell, J. Tao and N. Kleinstreuer, *Regul. Toxicol. Pharmacol.*, 2021, **125**, 105007.
5. C. M. Hansen, *Hansen Solubility Parameters: A User's Handbook*, CRC Press, Boca Raton, 2007.
6. L. Ye, Y. Xiong, Z. Chen, Q. Zhang, Z. Fei, R. Henry, M. Heeney, B. T. O'Connor, W. You and H. Ade, *Adv. Mater.*, 2019, **31**, 1808153.
7. C. Sprau, A. M. Cruz, L. Bautista, L. Molina, M. Wagner, C. L. Chochos, M. Della Pirriera and A. Colsmann, *Adv. Energy Sustainability Res.*, 2021, **2**, 2100043.
8. C. Liu, Y. Zhu, J. Chen, H. Wang, Y. Cao and J. Chen, *Synth. Met.*, 2018, **242**, 17-22.
9. M.-J. Li, B.-B. Fan, W.-K. Zhong, Z.-M.-Y. Zeng, J.-K. Xu and L. Ying, *Chin. J. Polym. Sci.*, 2020, **38**, 791-796.
10. D. Corzo, D. Rosas-Villalva, A. C. G. Tostado-Blázquez, E. B. Alexandre, L. H. Hernandez, J. Han, H. Xu, M. Babics, S. De Wolf and D. Baran, *Nat. Energy*, 2023, **8**, 62-73.
